# Supplementary material
Source: publisher site journal article supplement (https://www.dovepress.com/article/542695)
Supplement: Supplementary file 1 [file 542695%20Supplementary%20Material.docx]

**Supplementary material 1**

A total of 20 control subjects, 20 patients with eosinophilic CRSwNP, and 36 patients with non-eosinophilic CRSwNP were included in this study. From January 2023 to January 2024, all patients underwent preoperative sinus CT examination and estimated using VAS score,Lund Mackay score and SNOT-22 score. These 76 patients underwent endoscopic sinus surgery (FESS) or correction of nasal septum deviation with partial resection of the inferior turbinate. The subjects received standardized perioperative management, and the surgical efficacy was evaluated 6 months after surgery using Lund-Kennedy score and SNOT-22 score.

**Supplementary method 1**

Total RNA was extracted using the Trizol reagent (Invitrogen, USA) and reverse transcription using the Evo M-MLV RT Kit with gDNA Clean for qPCR II (AG11711, Accurate Biotechnology HUMAN, China).

**Supplementary method 2**

Samples were lysed with RIPA buffer and quantified by BCA assay reagent (Beyotime, China). Proteins were separated by SDS-PAGE (Epizyme Biotech, China), transferred onto PVDF membranes (Millipore, USA), and blocked with 6% skim milk for 2h. The membranes were incubated with following primary antibodies overnight at 4°C: anti-PP2A alpha/beta Rabbit monoclonal (R25422,1:1000, Zen-Bioscience, China), anti-Phospho-PP2A alpha (Tyr307) Rabbit monoclonal (R380708 , 1:1000, Zen-Bioscience, China), anti-E Cadherin Rabbit monoclonal(R22490,1:1000, Zen-Bioscience, China), anti-Vimentin Rabbit monoclonal (R22775,1:1000, Zen-Bioscience, China), anti-GSK3 beta Rabbit monoclonal (R22868,1:1000, Zen-Bioscience, China), anti-Phospho-GSK3 beta (Ser9) Rabbit monoclonal (R22943,1:1000, Zen-Bioscience, China),anti-Wnt3a Rabbit polyclonal (822111,1:1000, Zen-Bioscience, China), anti-Cyclin D1 Rabbit monoclonal (R380999,1:1000, Zen-Bioscience, China),anti-beta Catenin Rabbit monoclonal (R22820,1:1000, Zen-Bioscience, China), anti-Phospho-beta Catenin (Ser33/Ser37) Rabbit monoclonal (R381527,1:1000, Zen-Bioscience, China), anti-GAPDH Rabbit monoclonal (R24404,1:1000, Zen-Bioscience, China), Anti-beta Catenin non-phospho(active)S45(ab305261, 1:1000,abcam,UK). The following day, the membranes were incubated with HRP (Goat Anti-Rabbit IgG H&L) (511203,1:4000; Zen-Bioscience), and then visualized by the ECL system.

**Supplementary method 3**

Tissue samples were fixed in 4% paraformaldehyde for 24 h, followed by dehydration, embedding in paraffin, and subsequent sectioning into 5μm thick slides. Antigen was retrieved by citric acid buffer, and endogenous peroxidase activity was inhibited. Sections were permeabilized with Triton X-100 (Beyotime, China) , subsequently blocked with 5% BSA, and then incubated overnight at 4°C in a moist chamber with following primary antibodies: anti-PP2A alpha/beta Rabbit monoclonal (R25422;1:100, Zen-Bioscience, China), anti-E Cadherin Rabbit monoclonal (R22490;1:100, Zen-Bioscience, China), anti-Vimentin Rabbit monoclonal (R22775;1:100, Zen-Bioscience, China), anti-GSK3 beta Rabbit monoclonal (R22868;1:100, Zen-Bioscience, China), anti-Wnt3A Rabbit polyclonal (AF8352;1:100, Beyotime, China), anti-beta Catenin Rabbit monoclonal (R22820;1:100, Zen-Bioscience, China). On the following day, the sections were washed with PBST for 3x 5 min, incubated with secondary antibody (511203; Goat Anti-Rabbit IgG H&L(HRP),1:1000, Zen-Bioscience, China) for 1 h, followed by incubation with DAB.

**Supplementary method 4**

Cells Climbing films were fixed in 4% paraformaldehyde for 15 min, followed by permeabilization with Triton X-100(Beyotime, China). Subsequently, the films were washed with phosphate-buffered saline (PBS) for 3x 3 min, blocked using Quick Block™ Blocking Buffer (Beyotime, China) for 60 min at room temperature, and then incubated overnight at 4°C in a moist chamber with primary antibodies against E-cadherin, vimentin, as outlined in the immunohistochemistry protocol. Climbing films were incubated with secondary antibodies [550043; 1:500, Goat Anti-Rabbit IgG H&L (AF594), or 550037; 1:500, Goat Anti-Rabbit IgG H&L (AF488), Zen-Bioscience, China] for 1 hour, washed with PBST for 3x 5 min, and counterstained with DAPI (Beyotime, China).

**Supplementary method 5**

Monolayer primary human nasal polyp epithelial cells were cultured with complete medium containing 90% high glucose DMEM, 10% fetal bovine serum (FBS), and 1% Penicillin-Streptomycin Solution (Pricella, China), maintained at 37 °C in a 5% CO2 incubator. Upon reaching approximately 80% confluence, the cells were treated with 4 µM /L of LB-100 (SF1082-10Mm, Beyotime, China) or not as control for 48 h.

**Supplementary method 6**

Human bronchial epithelial cell line BEAS-2B (Pricella, China) was preserved at -80°C, recovered. After 2 generations, the third generation was seeded in 10 cm culture dish and cultured with complete medium as previously described. After reaching about 80% confluence, BEAS-2B cells were stimulated with 400 ng/ml of rhWNT3A (MedChemExpress, USA, HY-P70453A) to establish the Wnt- induced EMT group. Additionally, a combination treatment of 400 ng/ml of rhWNT3A and 4 µM/L of LB-100 was administered to create the PP2A inhibition group. The control group was cultured with complete medium only.

**Supplementary method 7**

The control group and Wnt-induced EMT cell group were established as previously described. Subsequently, BEAS - 2B cells were treated with rhWNT3A (400 ng/ml, MedChemExpress, USA, HY-P70453A) and PP2A agonist DT - 061 (8 µM, Selleck,USA,S8774) for 48 h to create a group with PP2A stimulation，collected cells were used for Western blot analysis and immunofluorescence assays.

**Supplementary method 8**

Mice were assigned to three groups(n=5): the control group underwent PBS administration only; NP model group received treatments of ovalbumin (OVA) and staphylococcal enterotoxins B(SEB), mice from intervention group were also treated with LB-100(MB3446-1, meilunbio, China), LB-100 powder was diluted with physiological saline to a concentration of 2mg/ml as the mother liquor and stored at -20 ° C. The mother liquor was diluted to a concentration of 0.15mg/ml, then administer it intraperitoneally to mice. Immunohistochemistry was performed using the following antibodies: primary antibodies: anti-E Cadherin Rabbit polyclonal (340341; 1:100, Zen-Bioscience, China), anti-Vimentin Rabbit monoclonal (R22775;1:100, Zen-Bioscience, China); Secondary antibody: Goat Anti-Rabbit IgG H&L(HRP)(511203;1:1000, Zen-Bioscience, China).
